# Supplementary material for: Sorption and Desorption of Vapor of n-Pentane by Porphyrin Aluminum Metal–Organic Framework: Mechanism of Bonding, Kinetics and Stoichiometry by Complementary In-Situ Time-Dependent and Ex-Situ Methods
Source: MDPI journal article supplement (doi:10.3390/nano13091529), 2023-05-01
Supplement: s1 [file s1]

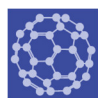

Supplementary Materials

# Sorption and Desorption of Vapor of n-Pentane by Porphyrin Aluminum Metal–Organic Framework: Mechanism of Bonding, Kinetics and Stoichiometry by Complementary *In-Situ* Time-Dependent and *Ex-Situ* Methods

Georgia-Annicette Banga-Bothy and Alexander Samokhvalov \*

Department of Chemistry, Morgan State University, 1700 East Cold Spring Lane, Baltimore, MD 21251, USA

\* Correspondence: alexandr.samokhvalov@morgan.edu

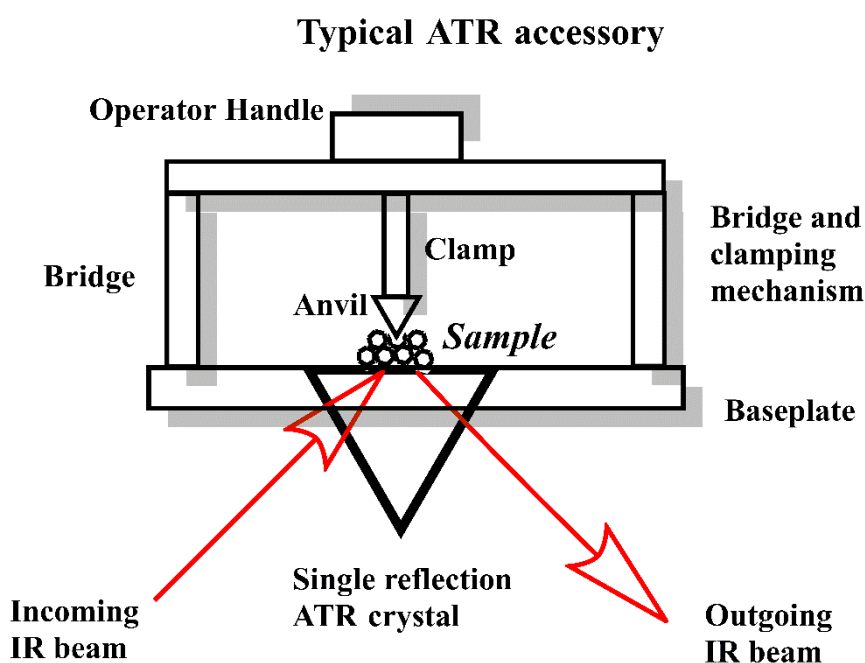

Figure S1. Generic schematics of typical ATR accessory.

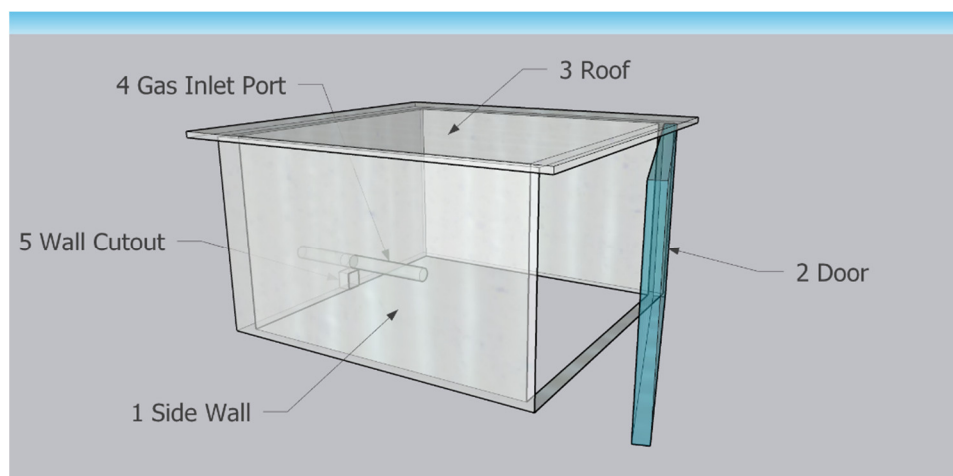

**Figure S2.** The simplified drawing of the flow chamber.

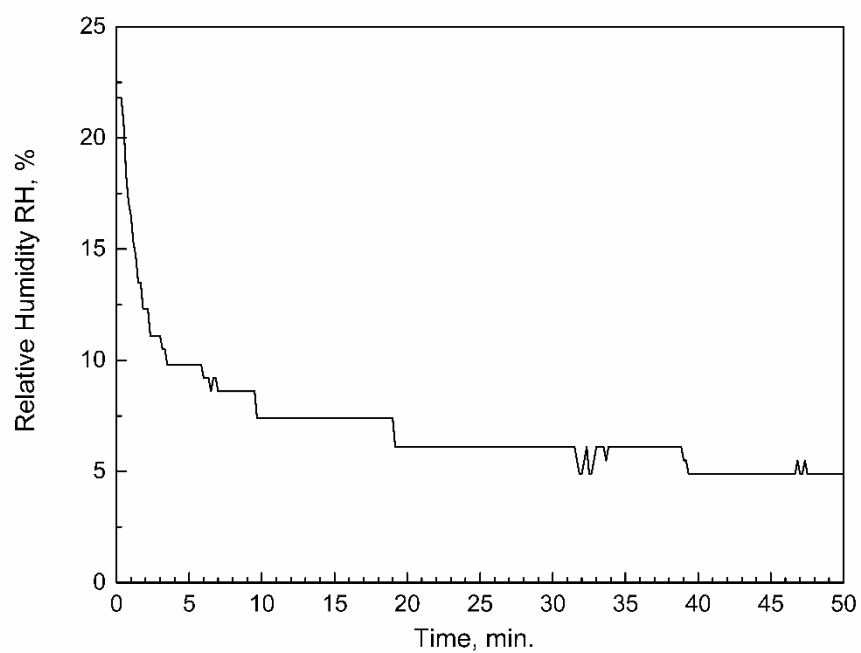

**Figure S3.** Relative humidity (RH) inside the flow chamber during pre-purge with dried air.

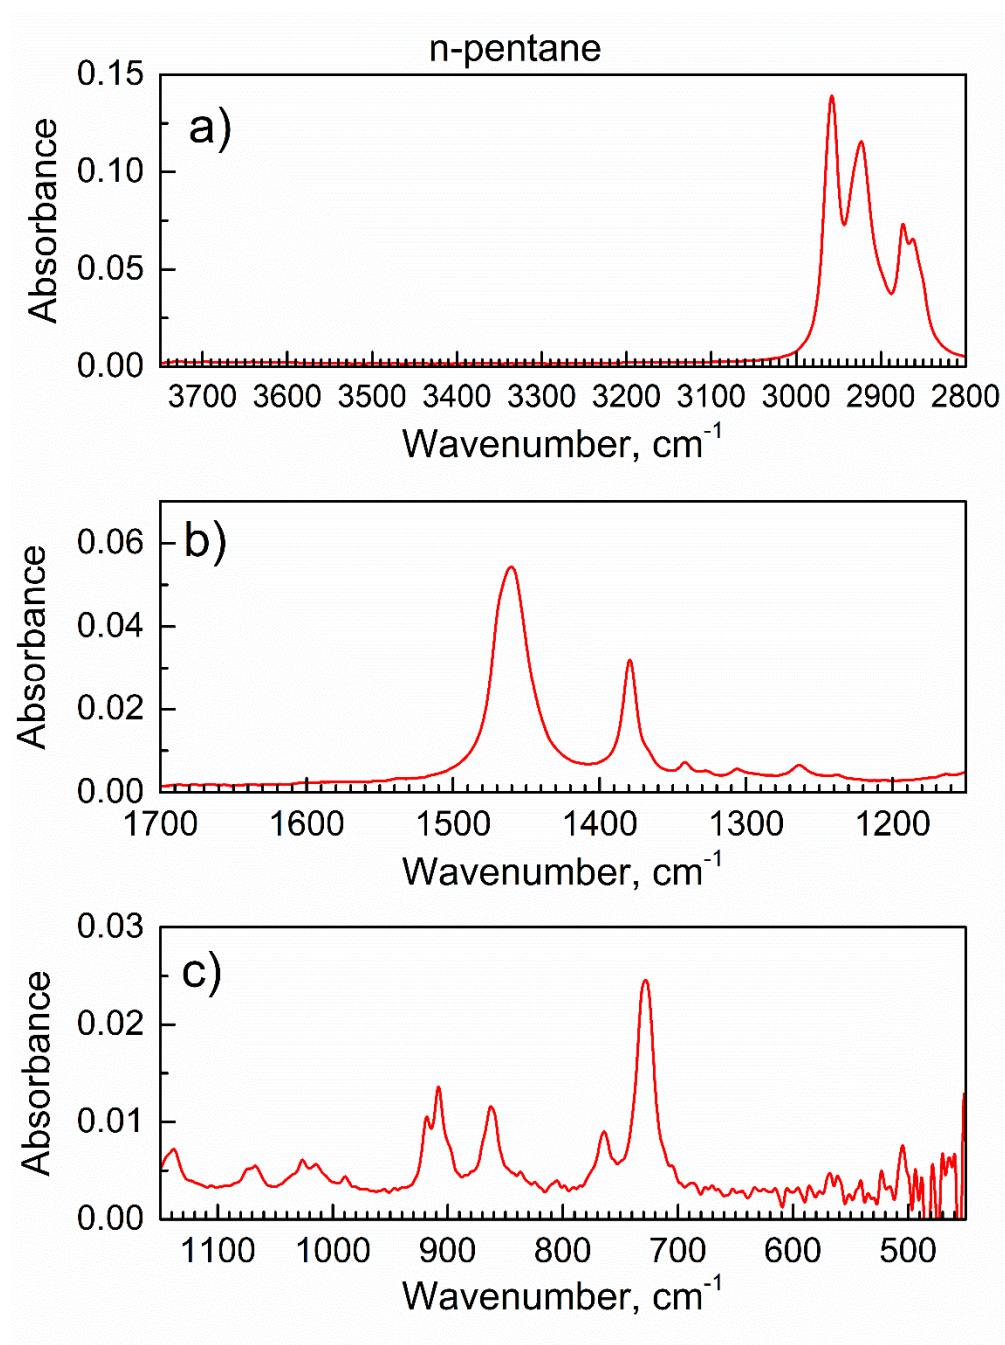

**Figure S4.** The ATR-FTIR spectrum of liquid n-pentane. (a) The high wavenumbers IR range; (b) the mid-IR range; (c) the low wavenumbers IR range.
